# Supplementary material for: Lithium rhenium(vii) oxide as a novel material for graphite pre-lithiation in high performance lithium-ion capacitors
Source: Royal Society of Chemistry journal article supplement (doi:10.1039/c6ta03810g), 2016-01-01
Supplement: c6ta03810g1.pdf [file c6ta03810g1.pdf]

### Electronic supplementary information

#### Lithium rhenium (VII) oxide as novel material for graphite pre-lithiation in high performance Lithium-ion capacitors

P. Jeżowski, K. Fic, O. Crosnier, T. Brousse, F. Béguin

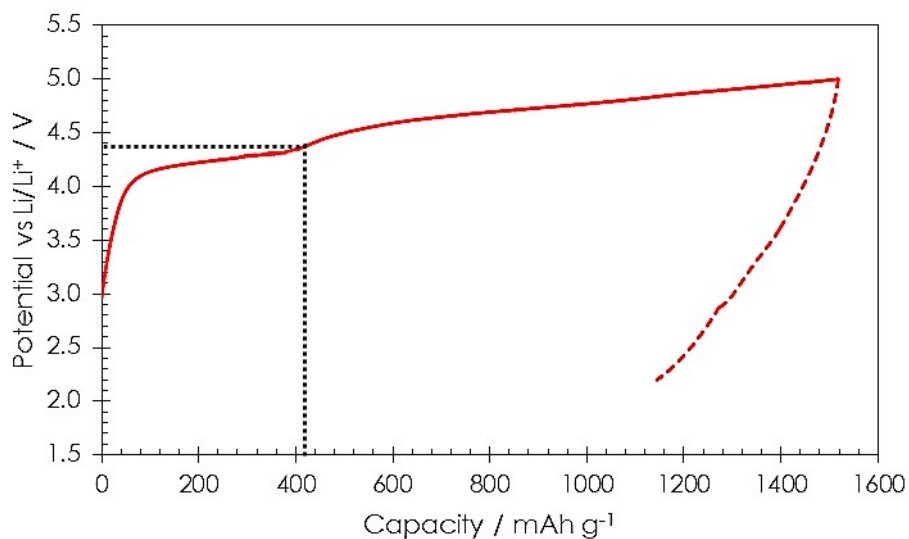

**Fig. S1** Extraction profile of lithium ions from a LRO/AC composite electrode. Lithium is extracted up to ca. 4.3 V vs Li/Li<sup>+</sup>. The second plateau above 4.5 V vs. Li/Li<sup>+</sup> can be related to side reactions such as electrolyte oxidation or rhenium oxide decomposition.

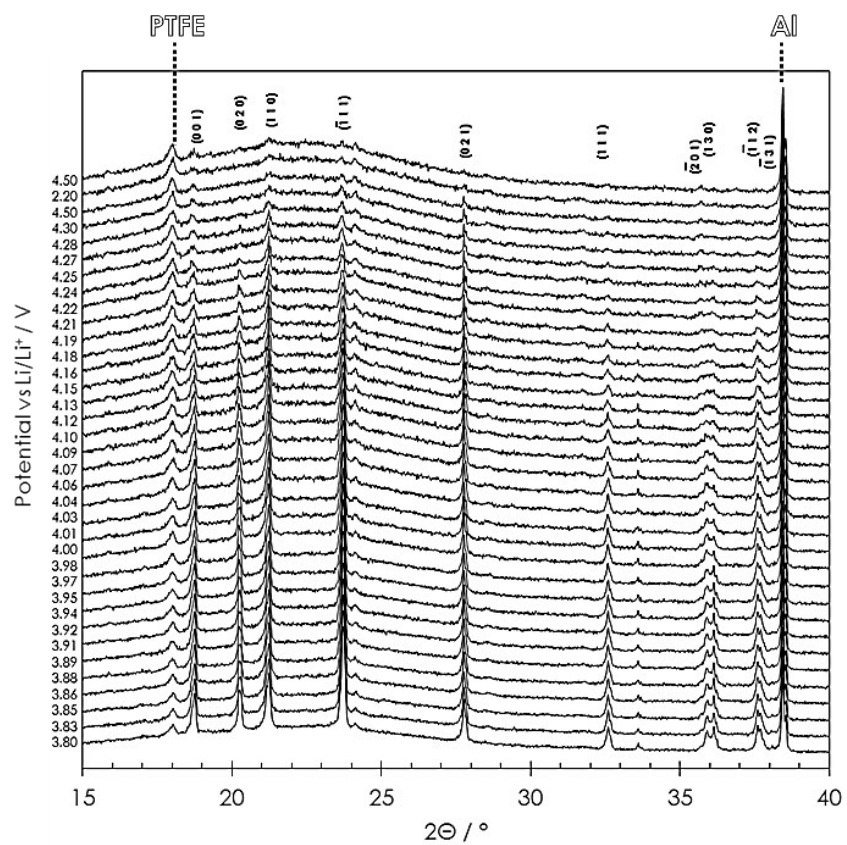

**Fig. S2** *In-situ* XRD analysis showing the effect of lithium ions extraction from LRO and resulting amorphization. Each pattern corresponds to data acquired at different potentials indicated on the Y axis. The peaks marked with Miller indices represent the LRO phase. The peaks corresponding to the cell components (aluminium foil, PTFE) are indicated.

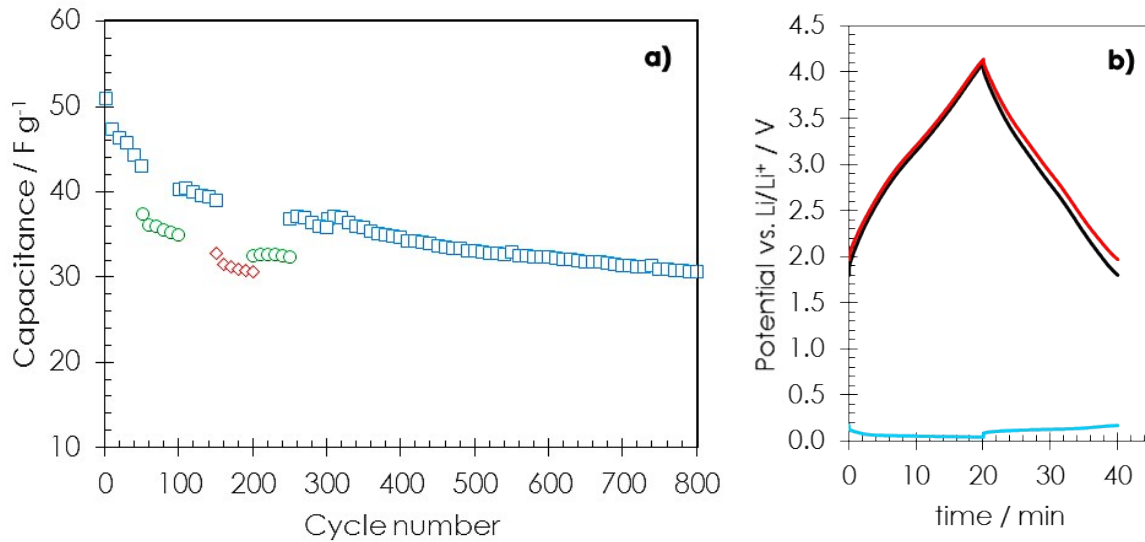

**Fig. S3** a) Cycle life of the LIC in the voltage range from 1.80 to 4.10 V at different current values of 250 mA g<sup>-1</sup> (blue squares), 500 mA g<sup>-1</sup> (green circles) and 650 mA g<sup>-1</sup> (red diamonds); b) galvanostatic charge/discharge profiles of positive electrode (red line), negative graphite electrode (blue line) and cell (black line), showing that the potential of the positive electrode reaches 1.97 V vs. Li/Li<sup>+</sup> when the cell voltage is 1.80 V. Such low potential may cause the formation of a S.E.I. on the surface of AC at the positive electrode and can be at the origin of poor cycle life.

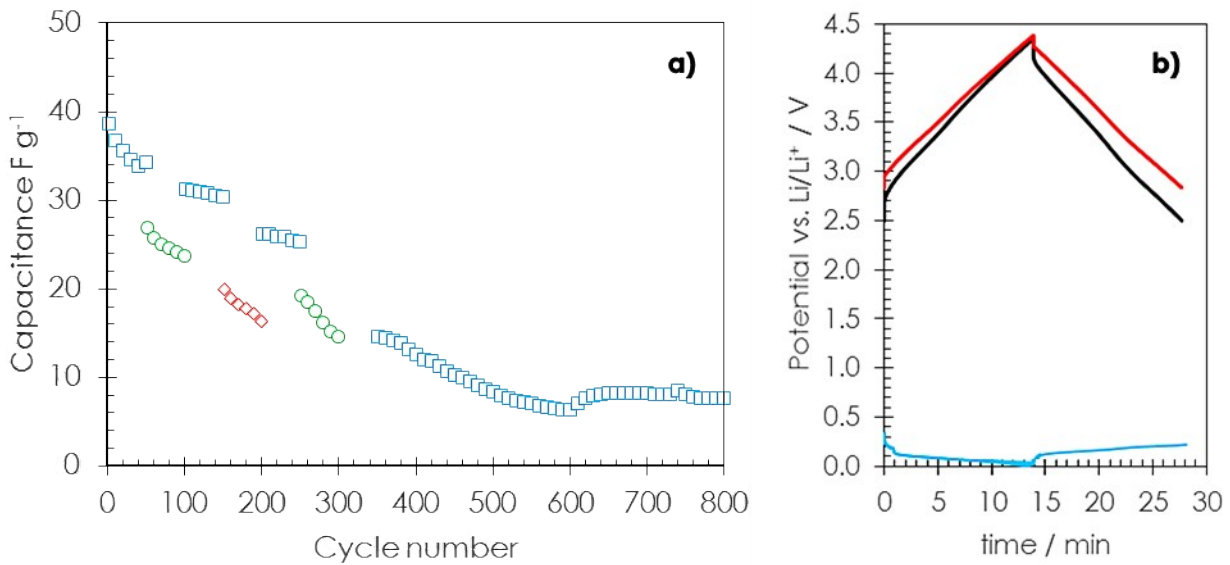

**Fig. S4** a) Cycle life of the LIC in the voltage range from 2.50 to 4.30 V at different current values of 250 mA g<sup>-1</sup> (blue squares), 500 mA g<sup>-1</sup> (green circles) and 650 mA g<sup>-1</sup> (red diamonds); b) galvanostatic (250 mA/g) charge/discharge profiles of positive electrode (red line), negative graphite electrode (blue line) and cell (black line), showing that the potential of the positive electrode reaches values higher than 4.20 V vs. Li/Li<sup>+</sup>. Such high values may cause side oxidation reactions of the LRO/AC positive electrode and be at the origin of poor cycle life.
